# Supplementary material for: Attack behaviour in naive gyrfalcons is modelled by the same guidance law as in peregrine falcons, but at a lower guidance gain
Source: Oxford University Press journal article supplement (doi:10.1242/jeb.238493), 2021-02-03
Supplement: jeb238493supp.pdf [file jeb238493supp.pdf]

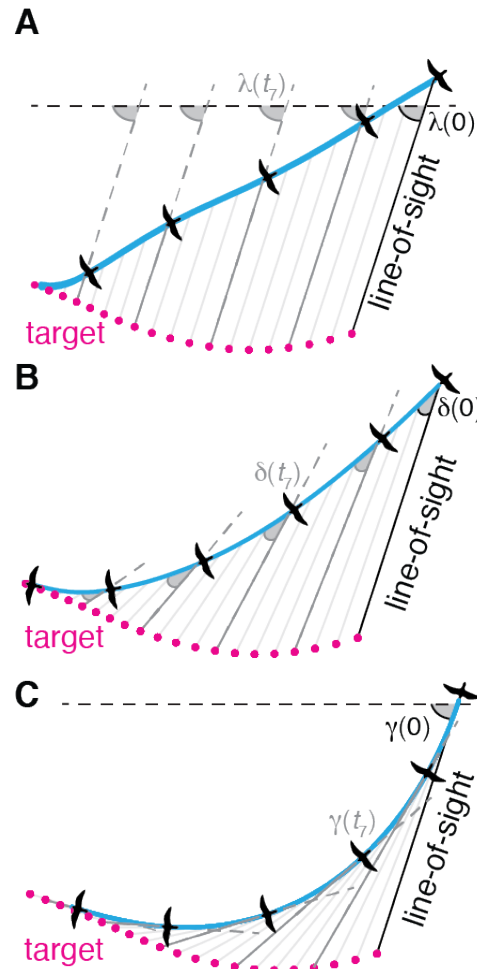

**Figure S1.** Explanation of the guidance terms, showing the geometry of three chase paths used to describe aerial attack behaviors, adapted from (Brighton et al. 2017). Straight lines mark the line-of-sight bearing ( $\lambda$ ) from attacker to target at regular time intervals. (A) Shows a parallel navigation course generated by proportional navigation (PN) at high values of the navigation constant  $N$ , which tends to nullify the line-of-sight rate ( $\lambda$  is held constant); (B) Shows a deviated pursuit generated by PN at  $N = 1$ , which tends to hold the deviation angle  $\delta$  constant by turning at a rate equal to the line-of-sight rate; (C) Shows a pure pursuit generated by either PN at  $N = 1$  or by proportional pursuit (PP) for an initial zero deviation angle, which tends to nullify the deviation angle  $\delta$  (velocity vector  $\gamma$  is aligned with  $\lambda$ ) resulting in a tail-chase. Either PN at intermediate values of  $N$ , or the mixed guidance law (PN+PP), will tend to produce trajectories intermediate between the cases shown.

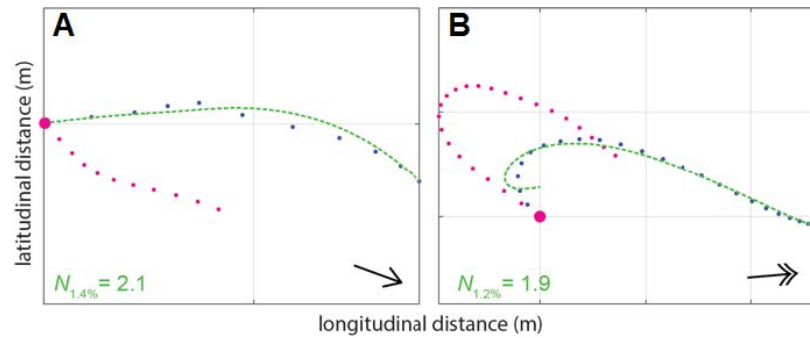

**Figure S2.** Two-dimensional (2D) attack trajectories for the 2/20 flights from  $n = 13$  Gyrfalcons that were not successfully modelled under proportional navigation (PN) guidance. (A,B) The measured trajectories of target (magenta points) and attacker (blue points), overlain with the simulation with the lowest relative error lasting  $\geq 2$  s (green dashed line), corresponding to Fig. S2A and Fig. S2B in Tables S1 and S2. The corresponding parameter estimate for  $N$  is displayed on each plot, with a subscript indicating the relative error achieved. Black arrows display mean wind direction; double headed arrows correspond to wind speeds  $> 20 \text{ km h}^{-1}$ ; gridlines at 10m spacing.

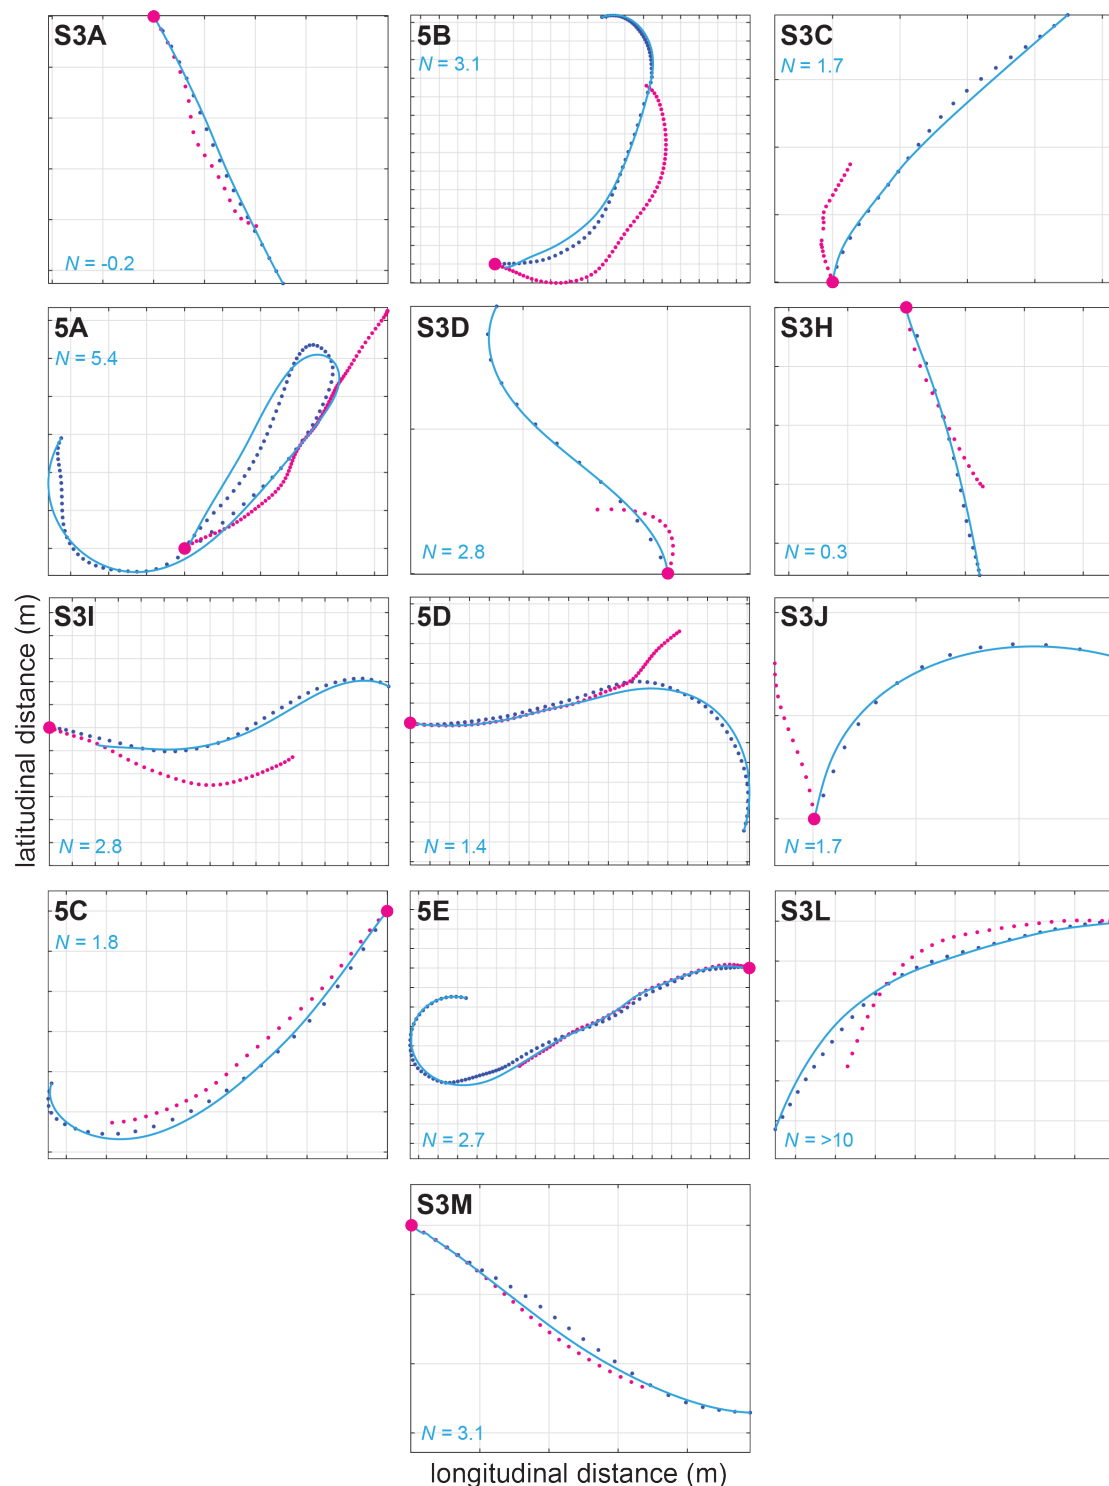

**Figure S3.** Two-dimensional (2D) attack trajectories for the 13/13 flights from  $n = 4$  Peregrines that were successfully modelled under proportional navigation (PN) guidance. Panels show the measured trajectories of the target (magenta points) and attacker (blue points), overlain with the longest simulation fitted to within 1.0% error tolerance (blue lines) in 2D. The corresponding parameter estimate for  $N$  is displayed on each plot. Note that the only simulations with values of  $N$  falling beneath the 3<sup>rd</sup> quartile for the Gyrfalcons ( $N < 1.4$ ) coincide with nearly straight sections of flight (panels S3A, S3H), for which parameter estimation is unreliable. Panel labels correspond to the numbering and lettering of the figure panels in the original paper from which the measured trajectory data are drawn. Gridlines at 10m spacing.

## Tables

| date     | bird ID | bird flight     | flight  | type  | pedigree                    | sex | mass (kg) |
|----------|---------|-----------------|---------|-------|-----------------------------|-----|-----------|
| 10/08/17 | 10      | 2 <sup>nd</sup> | Fig.S2A | chase | Gyrfalcon                   | ♀   | 1.295     |
| 10/08/17 | 8       | 2 <sup>nd</sup> | Fig.4J  | chase | Gyrfalcon                   | ♂   | 0.939     |
| 25/08/17 | 11      | 1 <sup>st</sup> | Fig.4K  | chase | Gyrfalcon                   | ♀   | 1.098     |
| 25/08/17 | 13      | 1 <sup>st</sup> | Fig.4A  | dash  | Gyrfalcon                   | ♂   | 0.850     |
| 25/08/17 | 16      | 1 <sup>st</sup> | Fig.4H  | dash  | Gyrfalcon                   | ♀   | 1.179     |
| 25/08/17 | 18      | 1 <sup>st</sup> | Fig.4B  | dash  | Gyrfalcon                   | ♀   | 1.144     |
| 25/08/17 | 17      | 1 <sup>st</sup> | Fig.4L  | chase | Gyrfalcon                   | ♂   | 0.944     |
| 25/08/17 | 21      | 1 <sup>st</sup> | Fig.4C  | dash  | Gyrfalcon                   | ♂   | 0.871     |
| 25/08/17 | 20      | 1 <sup>st</sup> | Fig.4D  | dash  | Gyrfalcon                   | ♀   | 1.164     |
| 25/08/17 | 22      | 1 <sup>st</sup> | Fig.4E  | dash  | Gyrfalcon                   | ♂   | 0.877     |
| 25/08/17 | 23      | 1 <sup>st</sup> | Fig.4F  | dash  | Gyrfalcon                   | ♂   | 0.858     |
| 25/08/17 | 73      | 1 <sup>st</sup> | Fig.4I  | dash  | 7/8 <sup>th</sup> Gyr-Saker | ♂   | 0.856     |
| 25/08/17 | M4      | 1 <sup>st</sup> | Fig.4G  | dash  | 7/8 <sup>th</sup> Gyr-Saker | ♀   | 1.136     |
| 26/08/17 | 13      | 2 <sup>nd</sup> | Fig.S2B | dash  | Gyrfalcon                   | ♂   | 0.838     |
| 26/08/17 | 18      | 2 <sup>nd</sup> | Fig.4M  | chase | Gyrfalcon                   | ♀   | 1.143     |
| 26/08/17 | 17      | 2 <sup>nd</sup> | Fig.4N  | chase | Gyrfalcon                   | ♂   | 0.937     |
| 26/08/17 | 23      | 2 <sup>nd</sup> | Fig.4O  | chase | Gyrfalcon                   | ♂   | 0.873     |
| 26/08/17 | 73      | 2 <sup>nd</sup> | Fig.4P  | chase | 7/8 <sup>th</sup> Gyr-Saker | ♂   | 0.872     |
| 26/08/17 | M4      | 2 <sup>nd</sup> | Fig.4Q  | chase | 7/8 <sup>th</sup> Gyr-Saker | ♀   | 1.129     |
| 26/08/17 | 13      | 3 <sup>rd</sup> | Fig.4R  | chase | 7/8 <sup>th</sup> Gyr-Saker | ♂   | 0.838     |

**Table S1.** Details of the  $n = 13$  Gyrfalcons used in the 20 flights meeting quality control for accuracy of the GPS data. The letter code for each flight corresponds to the lettering of all applicable figure panels.

| date     | bird | flight  | PP                     |              |              |                | PN   |          |              |                | PN+PP |                        |              |              |                |
|----------|------|---------|------------------------|--------------|--------------|----------------|------|----------|--------------|----------------|-------|------------------------|--------------|--------------|----------------|
|          |      |         | $K$ (s <sup>-1</sup> ) | duration (s) | distance (m) | relative error | $N$  | duration | distance (m) | relative error | $N$   | $K$ (s <sup>-1</sup> ) | duration (s) | distance (m) | relative error |
| 10/08/17 | 14   | Fig.S2A | 0.9                    | 2.0          | 18.8         | 0.70           | n.s. | n.s.     | n.s.         | n.s.           | -0.3  | 1.1                    | 5.4          | 56.5         | 0.74           |
| 10/08/17 | 1    | Fig.4J  | 0.6                    | 7.8          | 171.3        | 0.88           | 2.8  | 10.6     | 212.7        | 1.04           | 1.0   | 0.3                    | 13.6         | 225.3        | 1.04           |
| 25/08/17 | 2    | Fig.4K  | 0.1                    | 10.2         | 107.4        | 0.99           | 0.1  | 6.4      | 65.7         | 0.81           | -0.1  | 0.1                    | 10.2         | 107.4        | 0.65           |
| 25/08/17 | 4    | Fig.4A  | 1.1                    | 3.2          | 18.8         | 1.01           | 2.1  | 5.4      | 28.9         | 0.86           | 1.0   | 0.2                    | 5.4          | 28.9         | 0.56           |
| 25/08/17 | 5    | Fig.4H  | 1.0                    | 4            | 20.9         | 1.04           | 0.6  | 2.6      | 17.1         | 1.03           | 1.0   | 0.9                    | 4            | 20.9         | 0.28           |
| 25/08/17 | 6    | Fig.4B  | n.s.                   | n.s.         | n.s.         | n.s.           | 5.3  | 4.2      | 22.4         | 0.68           | 1.5   | 0.4                    | 4.2          | 22.4         | 0.23           |
| 25/08/17 | 7    | Fig.4L  | -0.1                   | 2.2          | 14.8         | 0.43           | -0.2 | 2.2      | 14.8         | 0.52           | 1.4   | -1.0                   | 3.4          | 24.6         | 0.92           |
| 25/08/17 | 8    | Fig.4C  | 8.8                    | 3.8          | 35.2         | 1.01           | 1.2  | 5        | 40.6         | 0.60           | 1.6   | -0.8                   | 5.2          | 41.1         | 0.59           |
| 25/08/17 | 9    | Fig.4D  | 0.2                    | 3.4          | 27.0         | 0.81           | 0.2  | 3.6      | 27.6         | 0.71           | 0.4   | -0.2                   | 3.6          | 27.6         | 0.52           |
| 25/08/17 | 10   | Fig.4E  | n.s.                   | n.s.         | n.s.         | n.s.           | 0.5  | 3.8      | 32.2         | 0.96           | 0.7   | -0.4                   | 3.8          | 32.2         | 0.78           |
| 25/08/17 | 11   | Fig.4F  | n.s.                   | n.s.         | n.s.         | n.s.           | 1.0  | 4.2      | 37.9         | 0.61           | 1.5   | 0.3                    | 4.2          | 37.9         | 0.51           |
| 25/08/17 | 12   | Fig.4I  | -0.3                   | 2.4          | 8.4          | 0.70           | 1.4  | 3.2      | 14.3         | 1.04           | 1.8   | 1.75                   | 4.0          | 18.1         | 0.28           |
| 25/08/17 | 13   | Fig.4G  | n.s.                   | n.s.         | n.s.         | n.s.           | 1.2  | 6.4      | 57.3         | 0.85           | 2.2   | 2.5                    | 7            | 59.2         | 0.65           |
| 26/08/17 | 4    | Fig.S2B | n.s.                   | n.s.         | n.s.         | n.s.           | n.s. | n.s.     | n.s.         | n.s.           | 1.6   | -1.8                   | 3.6          | 31.3         | 0.45           |
| 26/08/17 | 6    | Fig.4M  | 1.2                    | 6            | 63.2         | 1.04           | 1.4  | 8.2      | 86.9         | 0.35           | 1.8   | -0.2                   | 8.4          | 89.8         | 0.53           |
| 26/08/17 | 7    | Fig.4N  | 0.2                    | 3.2          | 21.6         | 0.68           | 0.2  | 3.2      | 21.6         | 0.81           | 0.0   | 0.2                    | 3.2          | 21.6         | 0.67           |
| 26/08/17 | 9    | Fig.4O  | 1.9                    | 2.6          | 10.0         | 0.64           | 1.4  | 2.6      | 10.0         | 0.41           | 1.2   | 0.22                   | 2.6          | 10.0         | 0.42           |
| 26/08/17 | 12   | Fig.4P  | 1.7                    | 13.6         | 162.6        | 1.00           | 1.0  | 12       | 148.3        | 0.51           | 1.0   | 0.2                    | 18.8         | 202.4        | 1.01           |
| 26/08/17 | 13   | Fig.4Q  | 2.3                    | 13           | 144.0        | 0.28           | 1.1  | 13.2     | 145.9        | 1.01           | -     | 28.6                   | 14.6         | 157.5        | 0.68           |
| 26/08/17 | 4    | Fig.4R  | n.s.                   | n.s.         | n.s.         | n.s.           | 1.2  | 14.2     | 143.2        | 0.85           | 1.3   | -0.2                   | 14.2         | 143.2        | 0.68           |

**Table S2.** Results of the two-dimensional (2D) guidance model fitting for the sample of 20 flights from  $n = 13$  Gyrfalcons, under proportional pursuit (PP), proportional navigation (PN), and mixed PN+PP guidance. Flights marked “n.s.” are those which could not be fitted to within the specified 1.0% error tolerance for  $\geq 2$  s. The letter code for each flight corresponds to the lettering of all applicable figure panels. See text for details and definitions.

| date     | bird | flight     | PP                     |              |              |                | PN  |              |              |                | PN+PP |                        |              |              |                |
|----------|------|------------|------------------------|--------------|--------------|----------------|-----|--------------|--------------|----------------|-------|------------------------|--------------|--------------|----------------|
|          |      |            | $K$ (s <sup>-1</sup> ) | duration (s) | distance (m) | relative error | $N$ | duration (s) | distance (m) | relative error | $N$   | $K$ (s <sup>-1</sup> ) | duration (s) | distance (m) | relative error |
| 09/05/14 | Le   | Fig.S3,S3A | -0.2                   | 3.6          | 58.5         | 0.51           | -   | 3.6          | 58.5         | 0.44           | 0.3   | 0.7                    | 8.8          | 121.6        | 1.00           |
| 28/04/14 | Le   | Fig.S3,5B  | -0.5                   | 3.0          | 47.7         | 0.68           | 3.1 | 13.2         | 195.7        | 1.01           | 2.2   | 0.3                    | 14.8         | 209.0        | 0.63           |
| 22/08/16 | Rn   | Fig.S3,S3C | -0.6                   | 2.8          | 35.0         | 0.46           | 1.7 | 4.2          | 53.7         | 0.99           | 1.9   | 0.6                    | 7.0          | 88.0         | 0.90           |
| 22/08/16 | Mo   | Fig.S3,5A  | -0.3                   | 5.0          | 55.7         | 0.90           | 5.4 | 18.4         | 199.5        | 1.01           | 2.9   | 0.8                    | 6.8          | 67.1         | 0.66           |
| 23/08/16 | Ra   | Fig.S3,S3D | n.s.                   | n.s.         | n.s.         | n.s.           | 2.8 | 2.6          | 23.3         | 0.44           | 8.0   | -5.6                   | 4.6          | 46.4         | 0.24           |
| 08/09/16 | Rn   | Fig.S3,S3H | 0.4                    | 3.4          | 47.6         | 0.55           | 0.3 | 3.2          | 47.2         | 0.43           | 1.6   | 3.5                    | 3.6          | 47.9         | 0.82           |
| 09/09/16 | Rn   | Fig.S3,S3I | 0.0                    | 2.2          | 41.7         | 0.87           | 2.8 | 7.4          | 156.7        | 0.77           | 1.3   | 0.2                    | 7.8          | 165.0        | 0.90           |
| 09/09/16 | Ra   | Fig.S3,5D  | 0.9                    | 12.2         | 235.4        | 0.86           | 1.4 | 11.4         | 223.5        | 0.92           | 0.7   | 0.5                    | 14.2         | 251.5        | 0.30           |
| 12/09/16 | Rn   | Fig.S3,S3J | n.s.                   | n.s.         | n.s.         | n.s.           | 1.7 | 2.6          | 37.7         | 0.87           | 0.6   | 0.2                    | 20.0         | 89.5         | 0.86           |
| 14/09/16 | Ra   | Fig.S3,5C  | 1.3                    | 5.2          | 113.7        | 0.68           | 1.8 | 5.4          | 115.7        | 0.87           | 0.8   | 0.3                    | 12.2         | 201.4        | 1.00           |
| 15/09/16 | Rn   | Fig.S3,5E  | 0.8                    | 14.2         | 195.8        | 0.96           | 2.7 | 17.6         | 242.2        | 0.62           | 3.4   | -0.1                   | 17.6         | 242.2        | 0.52           |
| 15/09/16 | Ra   | Fig.S3,S3L | -0.2                   | 2.6          | 51.1         | 0.06           | >10 | 5.4          | 105.8        | 1.00           | 1.0   | 0.6                    | 8.8          | 149.1        | 1.01           |
| 15/09/16 | Mo   | Fig.S3,S3M | -0.1                   | 3.6          | 44.9         | 0.77           | 3.1 | 4.6          | 56.9         | 0.90           | 2.6   | -2.2                   | 5.0          | 61.1         | 0.54           |

**Table S3.** Results of the two-dimensional (2D) guidance model fitting for the sample of 13 flights from  $n = 4$  Peregrines, under proportional pursuit (PP), proportional navigation (PN), and mixed PN+PP guidance. Flights marked “n.s.” are those which could not be fitted to within the specified 1.0% error tolerance for  $\geq 2$  s. The letter code for each flight corresponds to the lettering of all applicable figure panels. See text for details and definitions.
